# Supplementary material for: Synthesis and characterization of large-pore ordered mesoporous carbons using gyroidal silica template
Source: Royal Society of Chemistry journal article supplement (doi:10.1039/b516945c), 2006-01-01
Supplement: b516945c.pdf [file b516945c.pdf]

# **Synthesis and Characterization of Large-Pore Ordered Mesoporous Carbons using Gyroidal Silica Template**

**Tae-Wan Kim,<sup>\*†</sup> and Leonid A. Solovyov<sup>‡</sup>**

*Department of Chemistry (School of Molecular Science BK21), KAIST, Daejeon 305-701,*

*Republic of Korea*

*Institute of Chemistry and Chemical Technology, 660049 Krasnoyarsk, Russia*

\* Correspondence should be addressed to Dr. T.-W. Kim.

(Phone: (+82) 42 869 2870; Fax: (+82) 42 869 8130; E-mail: taewan75@kaist.ac.kr)

<sup>†</sup> Korea Advanced Institute of Science and Technology

<sup>‡</sup>Institute of Chemistry and Chemical Technology

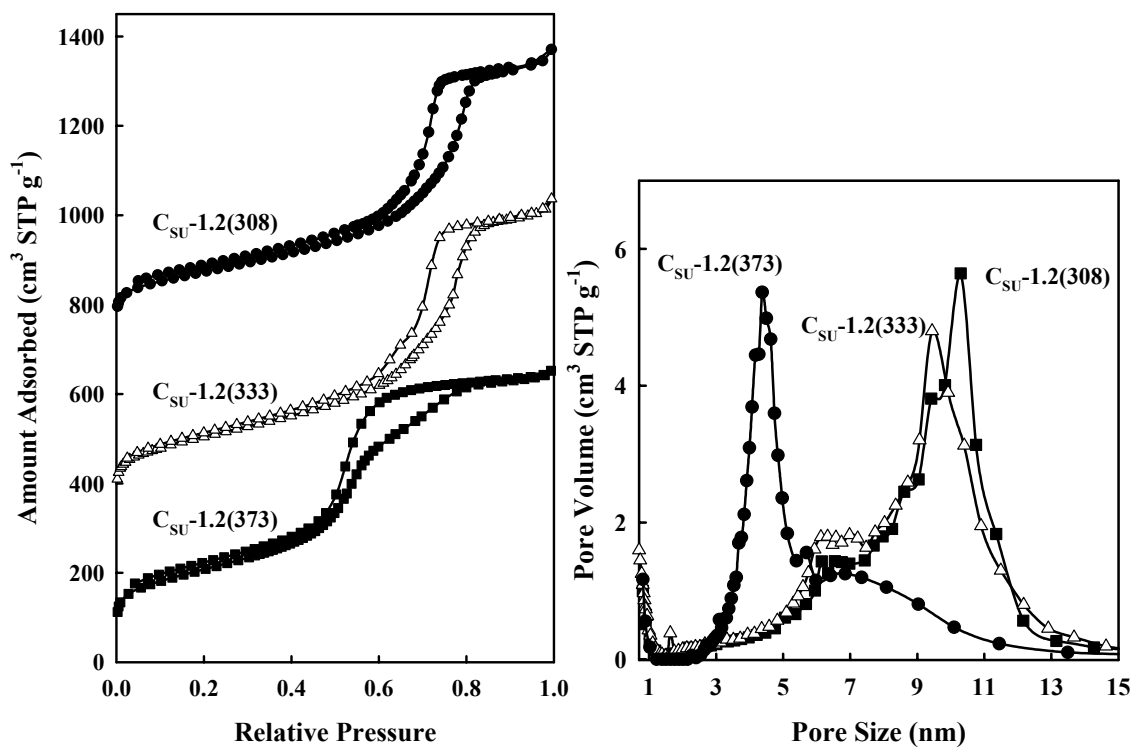

**Figure 1S.** Nitrogen adsorption-desorption isotherm and pore size distributions obtained by the BJH method for the mesostructured carbon materials with different hydrothermal treatment. The isotherms for C<sub>SU</sub>-1.2(333) and C<sub>SU</sub>-1.2(308) samples are offset vertically by 300 and 700 cm<sup>3</sup> STP g<sup>-1</sup>, respectively.
